# Supplementary material for: Single-atom tungsten doping induced chemical–electrochemical coupled pathway on Ni(OH) 2 enables efficient urea electrooxidation
Source: Royal Society of Chemistry journal article supplement (doi:10.1039/d4ee05340k), 2025-01-01
Supplement: d4ee05340k1.pdf [file d4ee05340k1.pdf]

1 **Supplementary note 1. Calculation of the electrochemical surface area (ECSA)**  
2 **and ECSA-normalized LSV.**

3 The ECSA of all catalysts was calculated according to the double-layer  
4 capacitance ( $C_{dl}$ ) by the CV method.

$$A_{ECSA} = \frac{C_{dl}}{C_s} \times A_{Geo}$$

5  
6 Therefore, the ECSA-normalized LSV was obtained according to the following  
7 formula:

$$j_{ECSA} = j_{Geo} \times \frac{C_{dl}}{C_s}$$

8  
9 In 1 M KOH electrolyte, a  $C_s$  value of 0.05 mF cm<sup>-2</sup> was chosen for the smooth  
10 Ni(OH)<sub>2</sub> surface.

11 **Supplementary note 2. XAS measurement and analysis.**

12 The W L<sub>3</sub>-edge and Ni K-edge X-ray absorption spectroscopy (XAS) spectra were  
13 measured at the beamline BL17C1 and BL01C1 of the National Synchrotron Radiation  
14 Research Center, Taiwan. Considering the low loading of W atoms, the W L<sub>3</sub>-edge data  
15 was collected in fluorescent mode. The incident photon energy was calibrated by using  
16 standard metal foil. Each XAS data in this work were obtained by merging more than  
17 three groups of data to ensure the accuracy of measurement. The X-ray absorption near-  
18 edge structure (XANES) and extended X-ray absorption fine structure (EXAFS) data  
19 were processed according to standard procedures using the ATHENA module  
20 implemented in the IFEFFIT software packages. Considering the effective quality of  
21 EXAFS data, the range of  $k$  was set to 3.0 ~ 11.0 Å<sup>-1</sup> for the Fourier transform (Hanning

1 window, Rbkg = 1).

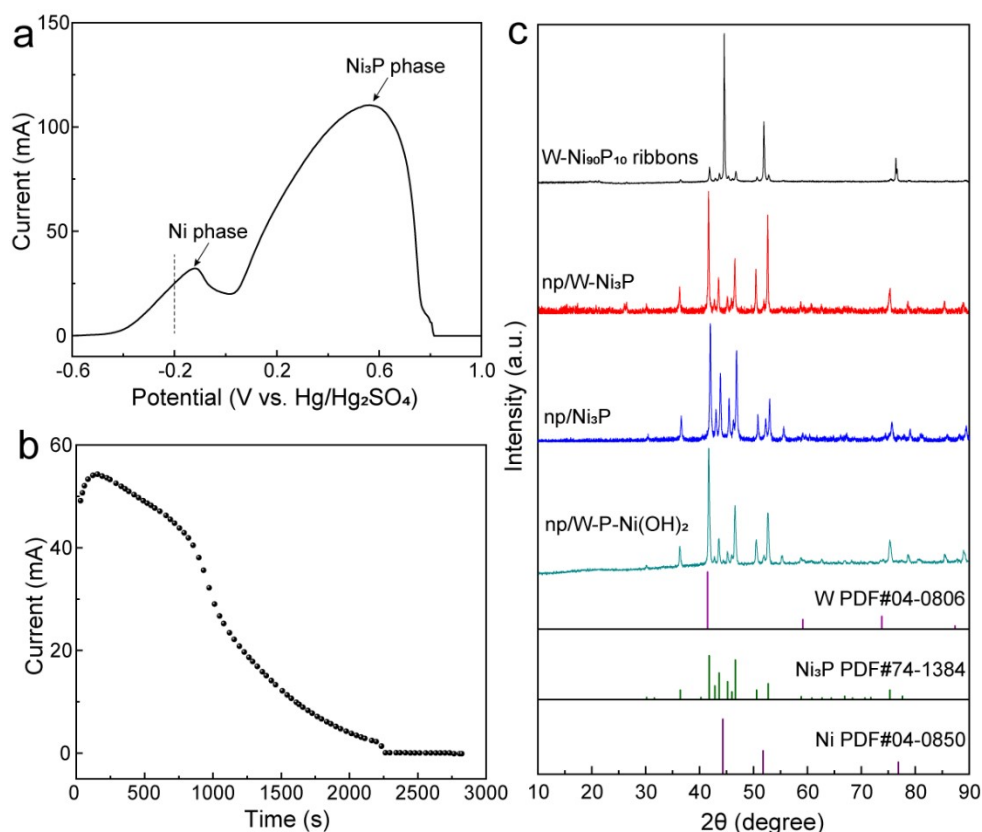

2

3 **Fig. S1 The fabrication of np/W-Ni<sub>3</sub>P.** (a) The LSV of W-Ni<sub>90</sub>P<sub>10</sub> ribbons in 0.5 M

4 HCl. The potential is calibrated to Hg/HgSO<sub>4</sub> reference electrode. The oxidation peaks

5 at ~ -0.2 V and 0.6 V are the corrosion of Ni phase and Ni<sub>3</sub>P phase, respectively. A

6 corrosion potential of -0.2 V was chosen to etch the Ni phase and reserve Ni<sub>3</sub>P phase;

7 (b) The chronoamperometry of W-Ni<sub>90</sub>P<sub>10</sub> ribbons at an applied potential of -0.2 V vs.

8 Hg/HgSO<sub>4</sub> in 0.5 M HCl. The zero value of corrosion current represents the complete

9 etching of Ni phase. (c) The XRD pattern of original W-Ni<sub>90</sub>P<sub>10</sub> ribbons, np/W-Ni<sub>3</sub>P,

10 np/Ni<sub>3</sub>P and np/W-P-Ni(OH)<sub>2</sub>. The standard crystal structures of Ni<sub>3</sub>P (PDF#74-1384),

11 Ni (PDF#04-0850) and W (PDF#04-0806) is given as comparison.

12

13

1

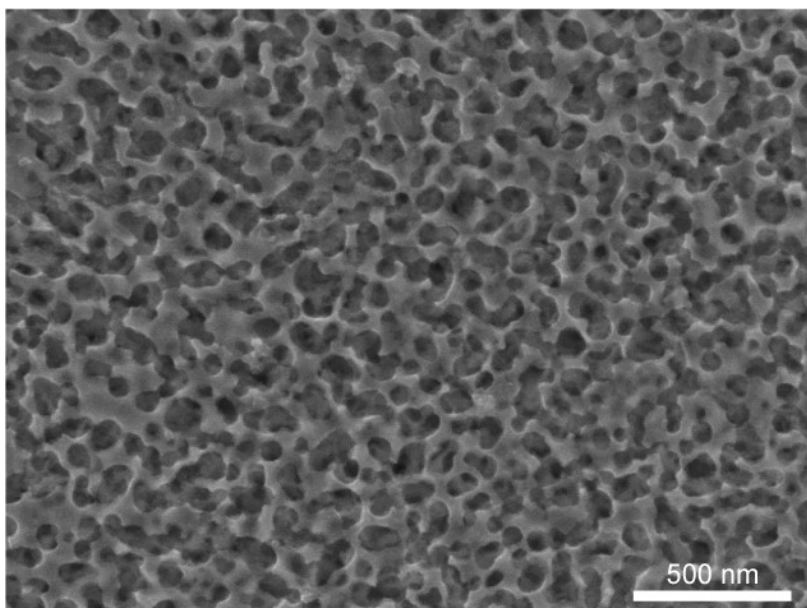

2

3 **Fig. S2 The SEM of of np/W-P-Ni(OH)<sub>2</sub>.** The self-supported nanoporous structure

4 enables fast gas/liquid mass transfer across the electrode.

5

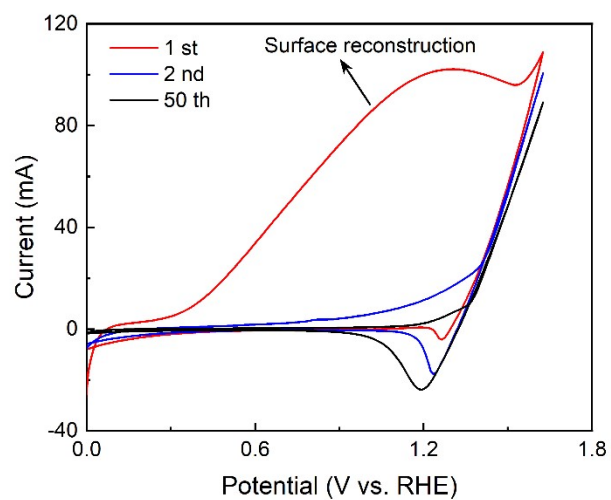

1

2 **Fig. S3 The 50 cycles in CV activation of np/W-P-Ni<sub>3</sub>P electrode.** It can be observed  
3 that the surface reconstruction is quickly finished during the first CV cycle with  
4 increasing oxidation current.

5

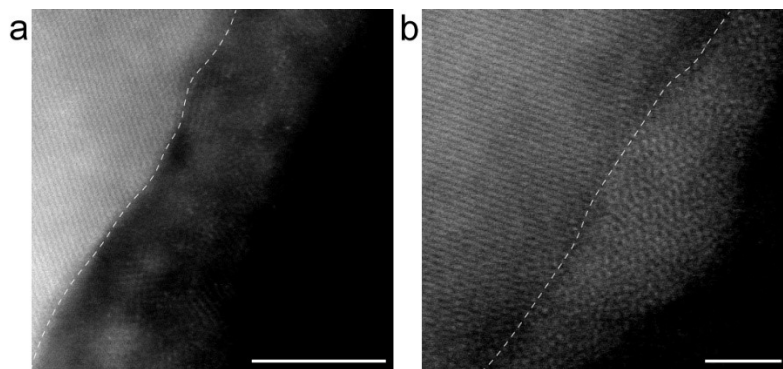

1

2 **Fig. S4** The HAADF-STEM images of np/W-P-Ni(OH)<sub>2</sub> electrode. Scale bar: (a)

3 5nm; (b) 2nm.

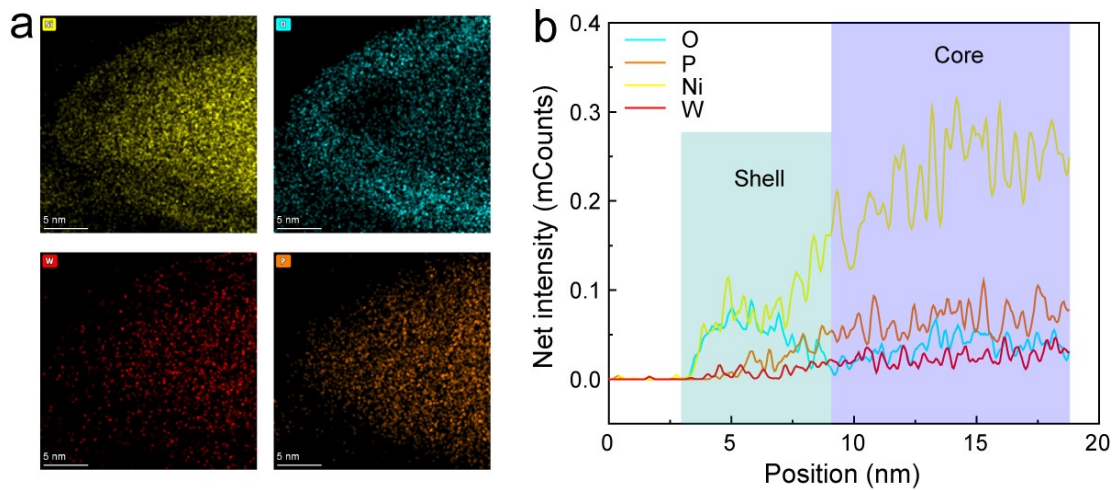

1

2 **Fig. S5 The EDS of in-situ reconstructed core-shell structure of np/W-P-Ni(OH)<sub>2</sub>.**

3 (a) The EDS mapping of each element in np/W-P-Ni(OH)<sub>2</sub>. (b) The line-scanning

4 intensity profile along with the radial direction in Figure 1d.

5

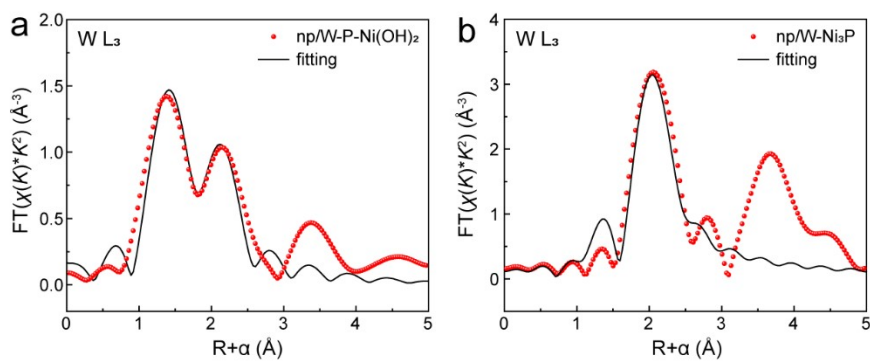

1

2 **Fig. S6** The fitting W-L<sub>3</sub> edge FT-EXAFS of np/W-P-Ni(OH)<sub>2</sub> and np/W-Ni<sub>3</sub>P. The  
 3 fitting parameters is listed in Tab. S2. The strong W-O scattering with coordination  
 4 number of 4.5 evidences the exist of W single atoms in Ni(OH)<sub>2</sub> shell. Note that the  
 5 coordination of W single atoms is nearly saturated, indicating that atomic W is tend to  
 6 locate in the subsurface of Ni(OH)<sub>2</sub>.

7



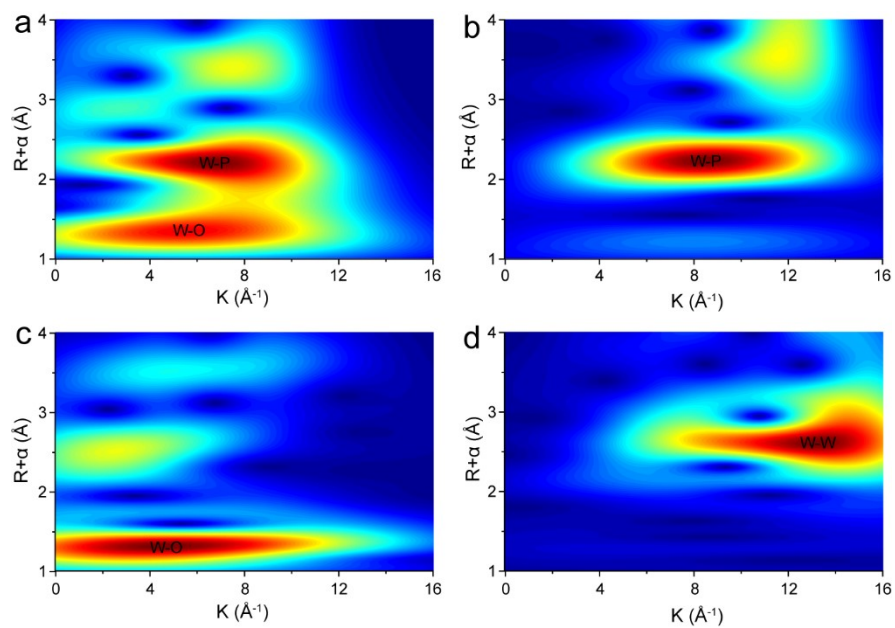

1

2 **Fig. S7** The WT-EXAFS of (a) np/W-P-Ni(OH)<sub>2</sub>; (b) np/W-Ni<sub>3</sub>P; (c) WO<sub>3</sub>; (d) W  
 3 foil.

4

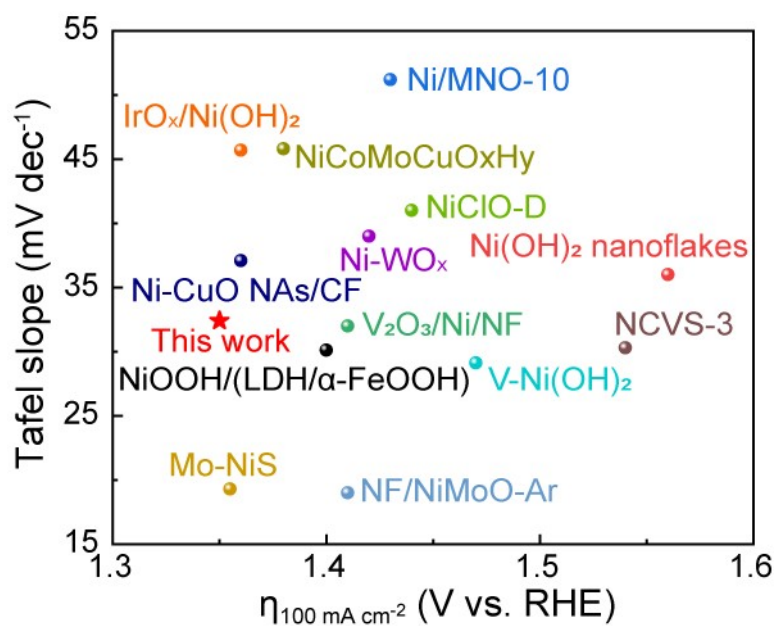

1

2 **Fig. S8 The comparison of the UOR performance between this work and state-of-**

3 **art catalysts.** The Tafel slope and overpotential data is obtained from different nickel-

4 based catalysts that have been reported. The specific data are listed in **Supplementary**

5 **Tab. 1.**

6

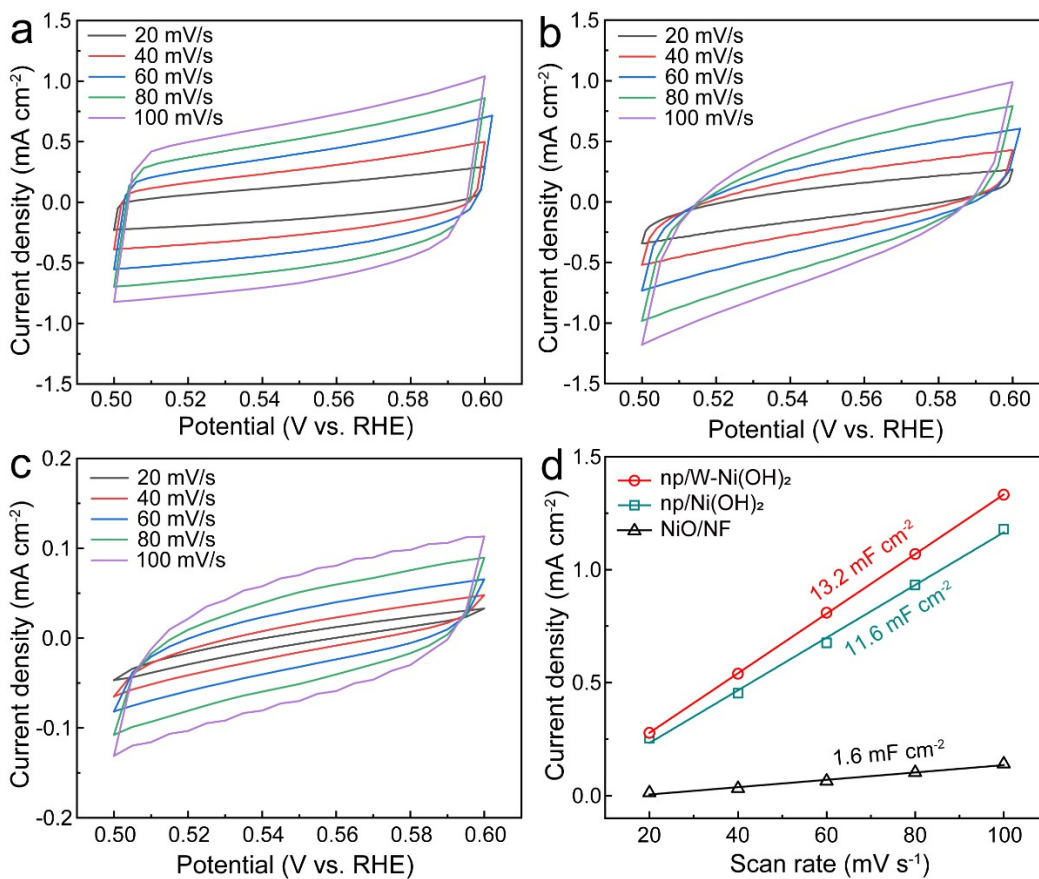

1

2 **Fig. S9 The quantification of electrochemical active surface area (ECSA) of all**

3 **catalysts.** The CV curves of (a) np/W-P-Ni(OH)<sub>2</sub>; (b) np/P-Ni(OH)<sub>2</sub>; (c) NiO/NF. The

4 double layer capacity (C<sub>dl</sub>) was measured by the CV method. The CV curves were

5 obtained in a non-Faraday potential range of 0.5-0.6 V vs. RHE with different scan rate

6 of 20; 40; 60; 80; 100 mV/s. (d) The fitting curves of double layer current versus scan

7 rate. The slope value of the fitting curves represents the C<sub>dl</sub> value of catalysts.

8

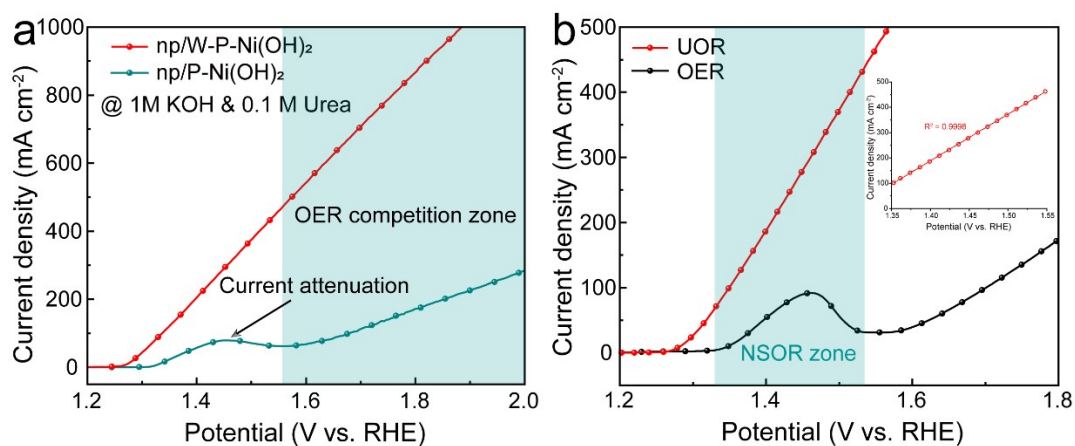

1

2 **Fig. S10** The LSV curves of  $\text{np/W-P-Ni(OH)}_2$  and  $\text{np/P-Ni(OH)}_2$ . (a) The LSV

3 curves of  $\text{np/W-P-Ni(OH)}_2$  and  $\text{np/P-Ni(OH)}_2$  in 1 M KOH with 0.1 M urea. The

4 current attenuation in the LSV curve of  $\text{np/P-Ni(OH)}_2$  represents the formation of

5  $\text{NiOOH}$ , leading to the competition OER. (b) The LSV curves of  $\text{np/W-P-Ni(OH)}_2$  for

6 UOR and OER. The inset is the fitting curve of the data points obtained from the UOR

7 LSV in NSOR zone. There is an obvious anode peak at 1.46 V in the LSV of  $\text{np/P-}$

8  $\text{Ni(OH)}_2$ , which is attributed to the current attenuation induced by the competition of

9 OER. However,  $\text{np/W-P-Ni(OH)}_2$  shows a linear relationship without the current

10 attenuation, indicating W doping enhances the selectivity towards UOR.

11

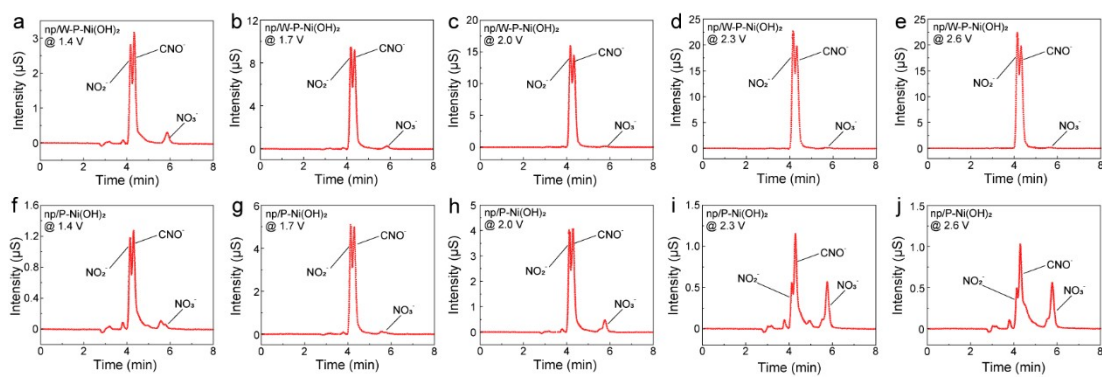

1

2 **Figure S11. The data of ion chromatography measurements for np/W-P-Ni(OH)<sub>2</sub>**

3 **and np/P-Ni(OH)<sub>2</sub> at different potentials. The concentration of CNO<sup>-</sup> in electrolyte**

4 **is comparable with NO<sub>2</sub><sup>-</sup> concentration. Therefore, it can be concluded that CNO<sup>-</sup> is**

5 **the final product but not reaction intermediate.**

6

7

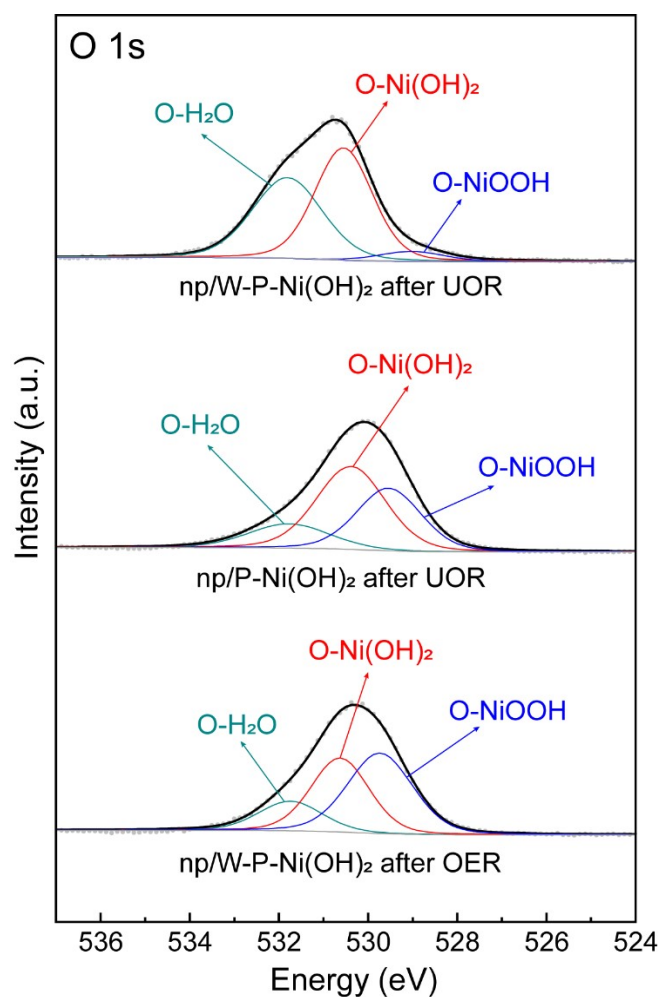

1

2 **Fig. S12 The O 1s XPS of np/W-P-Ni(OH)<sub>2</sub> and np/P-Ni(OH)<sub>2</sub> after reaction.** The

3 O 1s spectra is splitting to three peaks of O-NiOOH, O-Ni(OH)<sub>2</sub>, and O-H<sub>2</sub>O. The

4 integral area of O-NiOOH represents the accumulated Ni(OH)O to form NiOOH during

5 reaction. The integral area of O-Ni(OH)<sub>2</sub> represents the Ni(OH)<sub>2</sub>-Ni(OH)O circulation

6 during reaction.

7

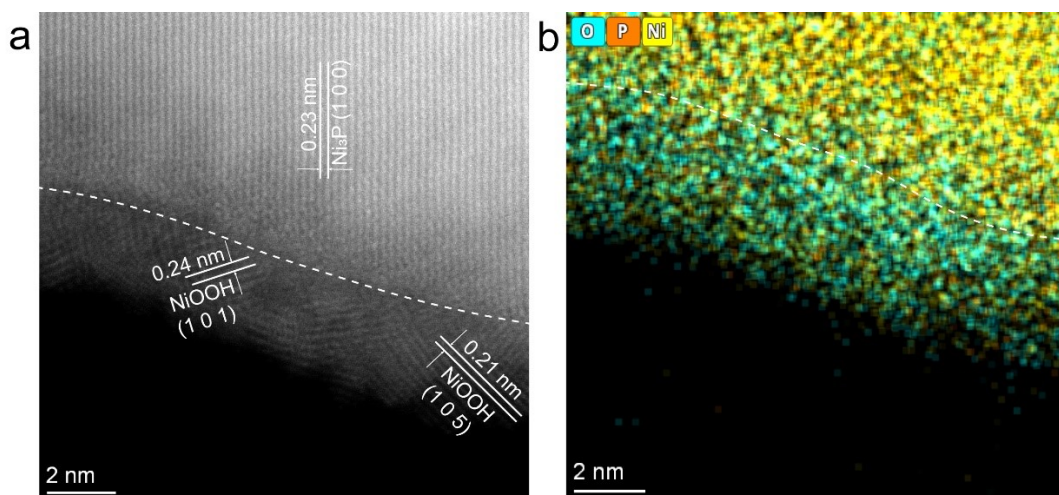

1  
 2 **Fig. S13 The HAADF-STEM images of np/P-Ni(OH)<sub>2</sub> after UOR.** (a) The HAADF-  
 3 STEM image of core-shell structure. The core is the lattice of Ni<sub>3</sub>P (1 0 0) facet. The  
 4 shell is the (1 0 1) and (1 0 5) facet of NiOOH, representing the accumulation of  
 5 Ni(OH)O due to the sluggish UOR on np/P-Ni(OH)<sub>2</sub> electrode. (b) The EDS mapping  
 6 of superimposed elements.  
 7

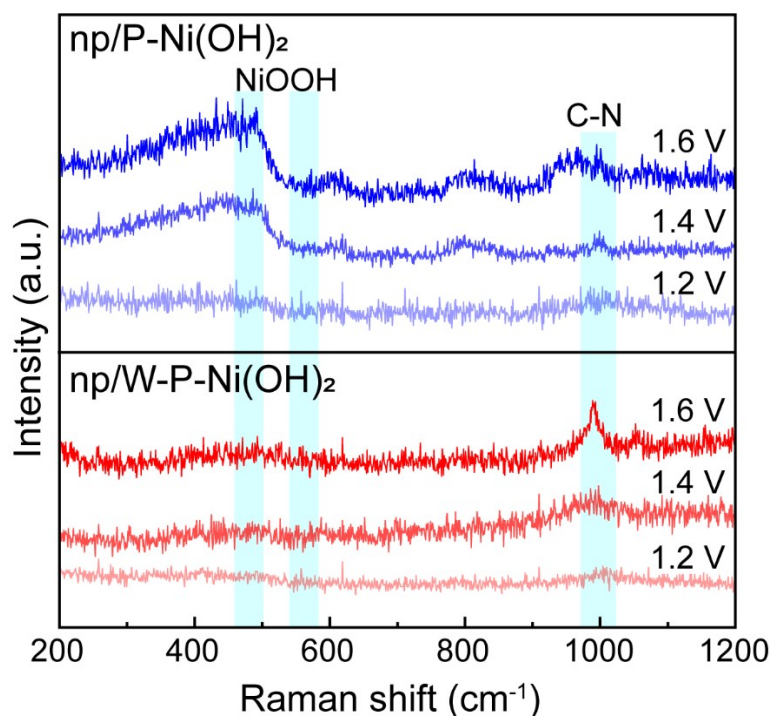

1

2 **Fig. S14 The in-situ Raman spectra of  $\text{np/W-P-Ni(OH)}_2$  and  $\text{np/P-Ni(OH)}_2$  during**

3 **UOR.** The in-situ Raman spectra was obtained in 1 M KOH with 0.33 M urea by using

4 a 532 nm laser. The data at 1.2 V, 1.4 V, and 1.6 V was chosen to make a comparison

5 to demonstrate the role of W in stabilizing the surface active species.

6



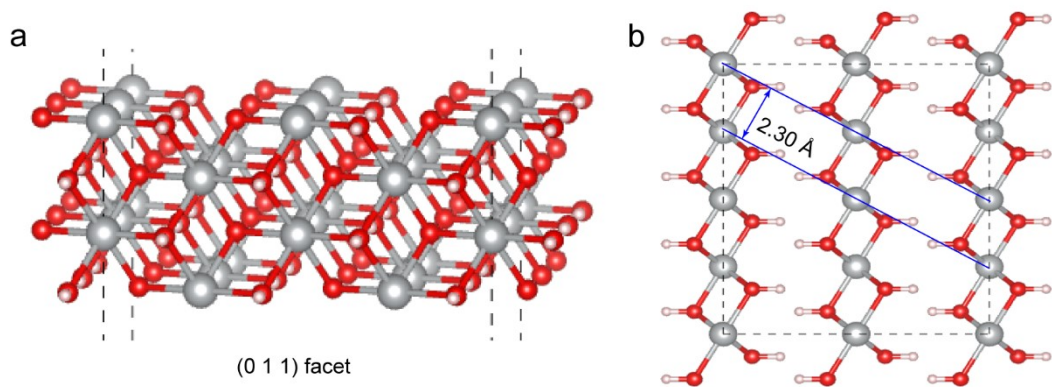

1

2 **Fig. S15 The theoretical model of pure Ni(OH)<sub>2</sub>.** (a) The (0 1 1) facet of pure  
 3 Ni(OH)<sub>2</sub>. (b) The optimized Ni(OH)<sub>2</sub> model. The lattice distance is 2.30 Å, correlated  
 4 with the HAADF-STEM results. It can be seen that both Ni and O atoms are on the  
 5 surface layer, which is reasonable for the chemical-electrochemical coupled UOR.

6 Gray atom: Ni; red atom: O; pink atom: H.

7

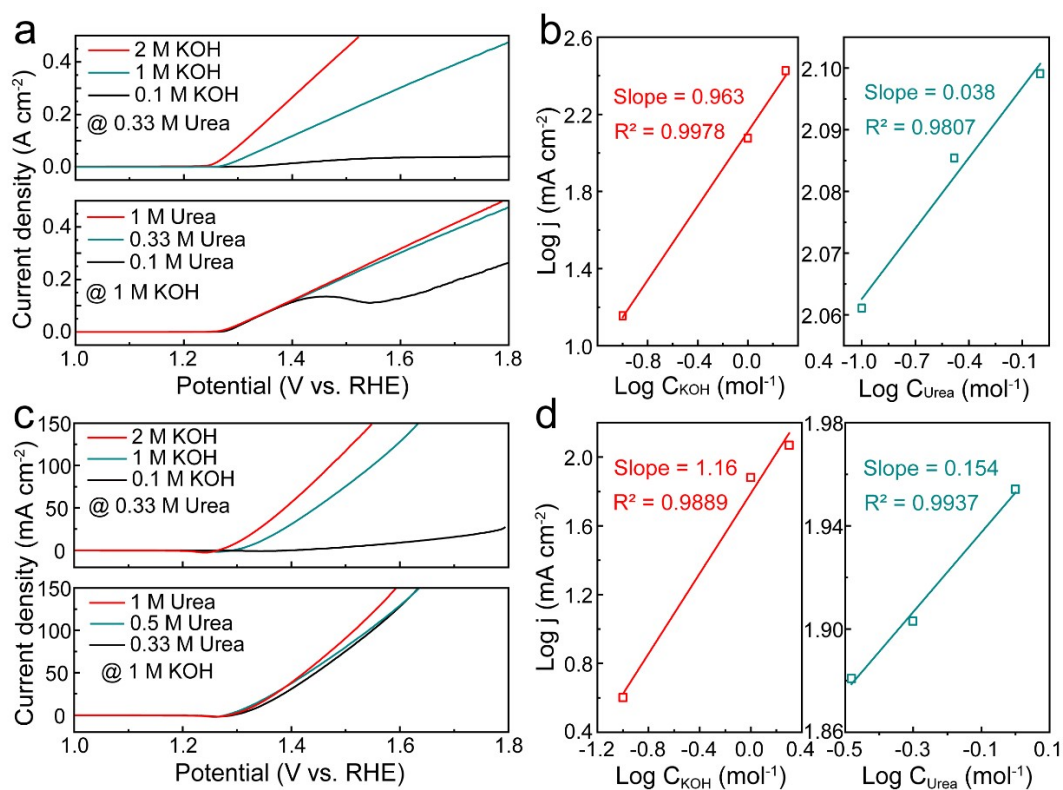

1

2 **Fig. S16 The electrochemical kinetics analysis of np/P-Ni(OH)<sub>2</sub> and Ni(OH)<sub>2</sub>/NF.**

3 (a) The LSV curves of np/P-Ni(OH)<sub>2</sub> in different concentrations of KOH and urea. (b)

4 The fitting curves according to the current density and concentrations from (a) at 1.4

5 V. The slope value represents the reaction order, which demonstrates the dependence

6 of the reaction rate on the concentration of the reactants. (c) The LSV curves of Ni(OH)<sub>2</sub>

7 in different concentrations of KOH and urea. (d) The fitting curves according to the

8 current density and concentrations from (a) at 1.5 V.

9

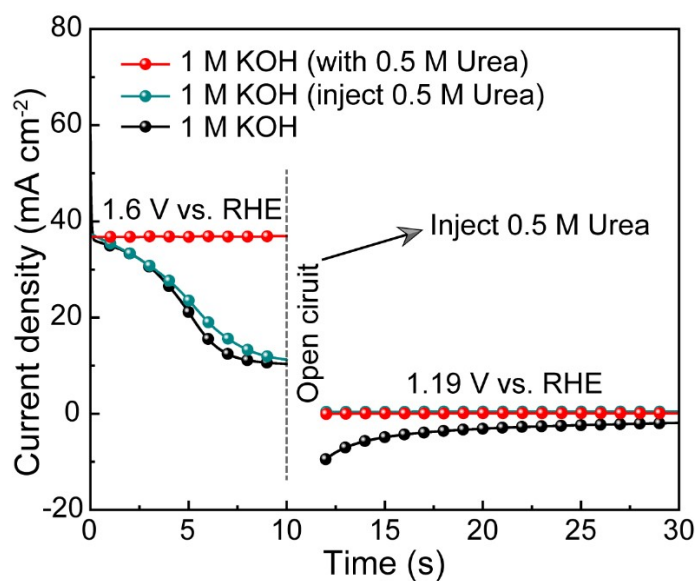

1

2 **Fig. S17 The multiple-potential step curves of np/P-Ni(OH)<sub>2</sub>.** First, a high oxidation  
 3 potential of 1.6 V vs. RHE was set for np/P-Ni(OH)<sub>2</sub> electrode to enrich the Ni(OH)O  
 4 species. Then, 0.5 M urea was injected during the open circuit state of 2 s to make  
 5 Ni(OH)O react with urea adequately. Finally, the potential was switched to 1.19 V (the  
 6 open circuit potential) to identify the residual Ni(OH)O species.

7

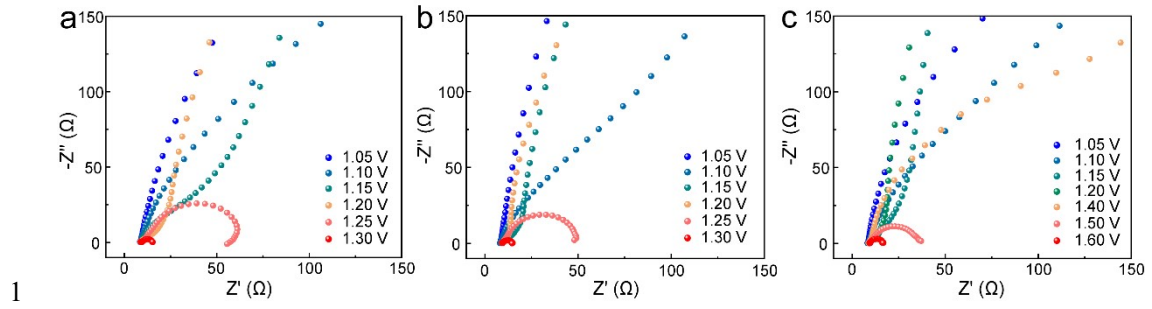

1  
2 **Fig. S18 The in-situ EIS Nyquist plots of np/W-P-Ni(OH)<sub>2</sub> and np/P-Ni(OH)<sub>2</sub>.** (a)

3 The in-situ EIS Nyquist plots of np/W-P-Ni(OH)<sub>2</sub> for UOR from 1.05 V to 1.3 V. (b)

4 The in-situ EIS Nyquist plots of np/P-Ni(OH)<sub>2</sub> for UOR from 1.05 V to 1.3 V. (c) The

5 in-situ EIS Nyquist plots of np/W-P-Ni(OH)<sub>2</sub> for OER from 1.05 V to 1.6 V.

6

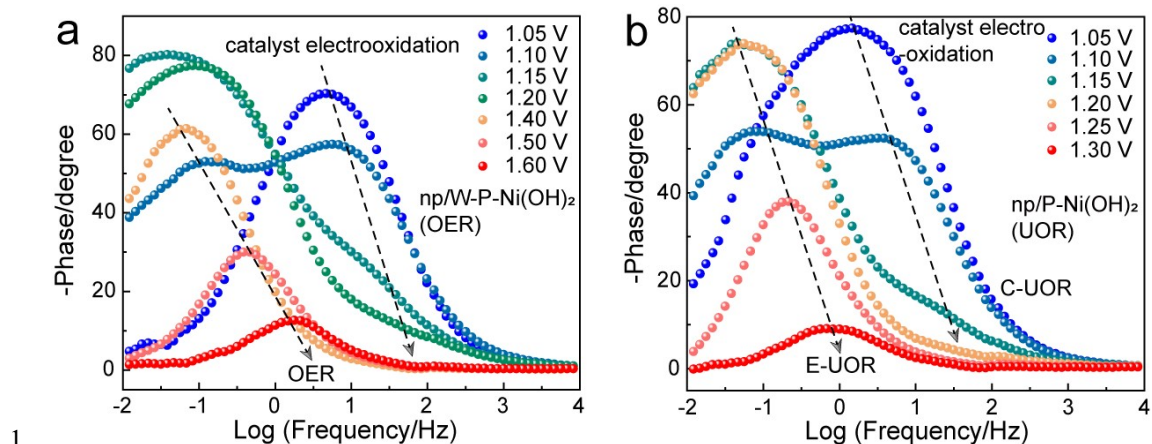

1  
2 **Fig. S19** The in-situ EIS Bode plots of (a) np/W-P-Ni(OH)<sub>2</sub> for OER and (b) np/P-  
3 Ni(OH)<sub>2</sub> for UOR. (a) The data was collected at a frequency range of 10000~0.01 Hz  
4 from 1.05 V to 1.6 V. The middle frequency includes the electrooxidation of np/W-P-  
5 Ni(OH)<sub>2</sub> and the low frequency represents the electrochemical oxygen oxidation on the  
6 np/W-P-Ni(OH)<sub>2</sub> electrode. (b) The data was collected at a frequency range of  
7 10000~0.01 Hz from 1.05 V to 1.3 V. The middle frequency includes the  
8 electrooxidation of np/P-Ni(OH)<sub>2</sub> and the spontaneously chemical dehydrogenation of  
9 urea. The low frequency represents the electrochemical urea oxidation on the oxidated  
10 np/P-Ni(OH)<sub>2</sub> electrode.

11

12

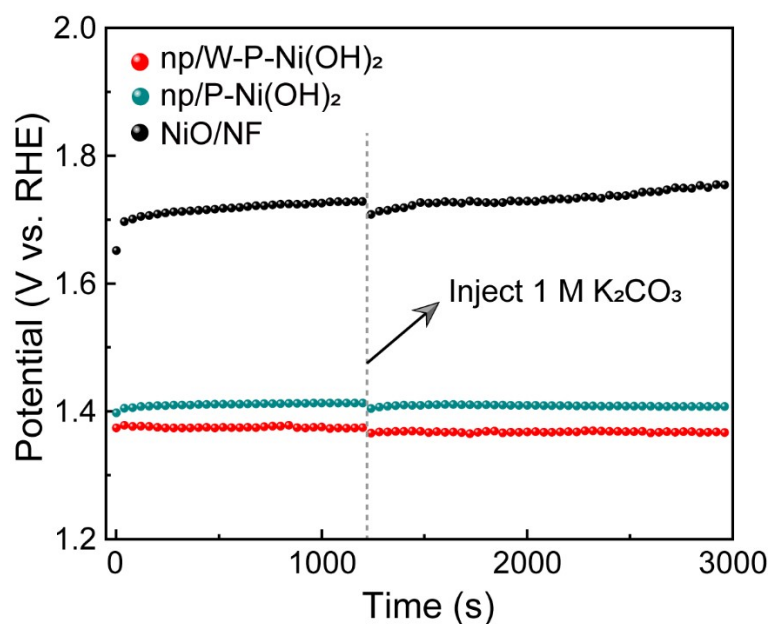

1  
2 **Fig. S20** The chronopotentiometry curves of np/W-P-Ni(OH)<sub>2</sub>, np/P-Ni(OH)<sub>2</sub>, and  
3 **NiO/NF**. The chronopotentiometry curves were obtained at 50 mA cm<sup>-2</sup> in 1 M KOH  
4 with 0.5 M urea. After 1200 s, 2 ml 1 M K<sub>2</sub>CO<sub>3</sub> solution was injected into the  
5 electrolyte. When 2 ml 1 M K<sub>2</sub>CO<sub>3</sub> solution was injected into the electrolyte, NiO/NF  
6 showed obvious activity decay, which can be attributed to the too-strong adsorption of  
7 \*COO on the NiOOH surface. However, there are no clear changes on np/W-P-Ni(OH)<sub>2</sub>  
8 and np/P-Ni(OH)<sub>2</sub> electrodes, evidencing that the desorption of \*COO is not limited on  
9 Ni(OH)O. This also correlates with the vibration of CO<sub>3</sub><sup>2-</sup> located at 1396 cm<sup>-2</sup> on np/W-  
10 P-Ni(OH)<sub>2</sub> electrode in the in-situ SEFT-IR.  
11

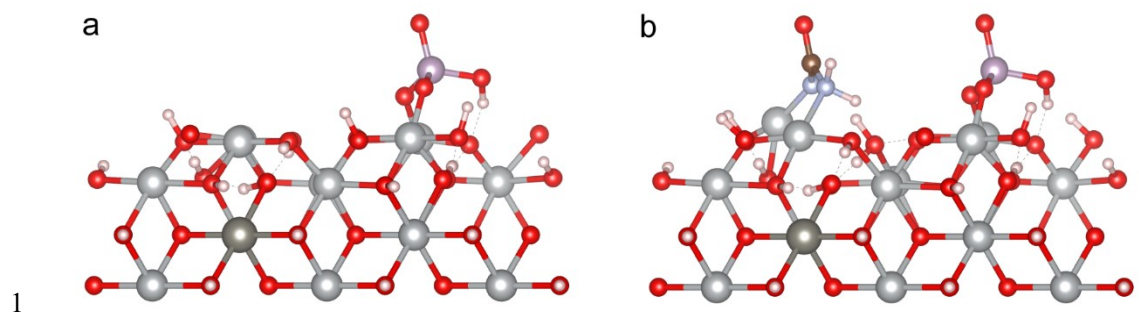

1

2 **Fig. S21** The theoretical model of W-P-Ni(OH)<sub>2</sub> before and after adsorbing urea

3 **molecule.** Gray atom: Ni; dark atom: W; red atom: O; pink atom: H; blue atom:

4 N; brown atom: C; purple atom: P.

5

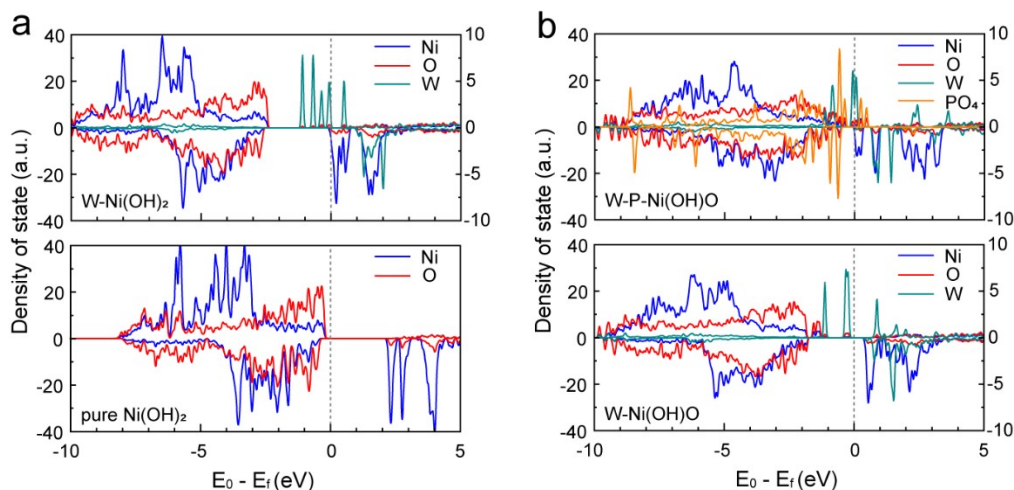

1

2 **Fig. S22 The comparison between the DOS of different structures.** (a) The DOS of

3  $\text{W-Ni(OH)}_2$  and pure  $\text{Ni(OH)}_2$ . (b) The DOS of  $\text{W-P-Ni(OH)O}$  and  $\text{W-Ni(OH)O}$ .

4 Obviously, W doping induces a strongly localized state, correlated with the Bader

5 analysis result. Electron localization means the transition of Ni atoms from a metallic

6 state to a semi-metallic state, which is not conducive to the six-electron-transfer urea

7 electrooxidation. However, after adsorbing  $\text{PO}_4^{2-}$ , the energy band becomes more

8 complicated and occupies the Fermi level. This result indicates that  $\text{PO}_4^{2-}$  strengthens

9 the metallic state of Ni sites.

10



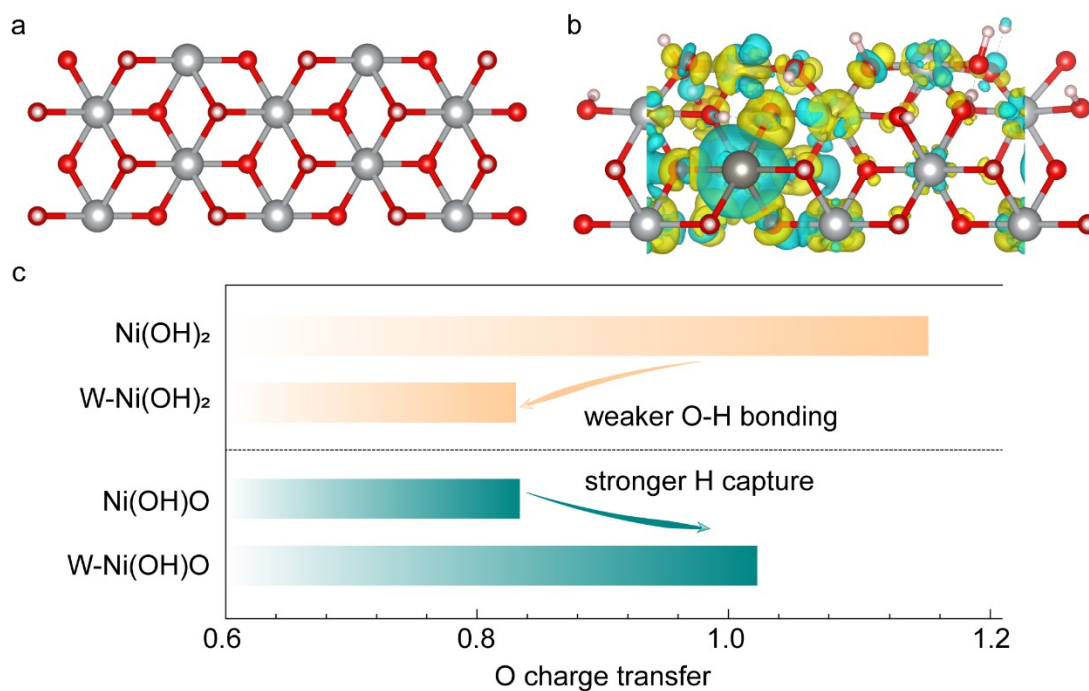

1  
2 **Fig. S23 The Bader analysis of W-doped Ni(OH)<sub>2</sub>.** (a) The (011) facet of pure  
3 Ni(OH)<sub>2</sub>. (b) The charge transfer after W doping. (c) The O charge transfer on different  
4 catalyst models. W doped Ni(OH)<sub>2</sub> system possesses less charge (6.831) accumulating  
5 on the O atom than that of pure Ni(OH)<sub>2</sub> (7.159), indicating that the atomic W doping  
6 leads to a more positive valence of the O atom, that is to say, the O-H bonding is  
7 weakened so that the hydroxyl dehydrogenation process can be more likely to happen.  
8 Interestingly, when H vacancy forms, O gets less charge in pure Ni(OH)<sub>2</sub> surface, but  
9 gets more charge in W doped system. This difference demonstrates that W has strong  
10 electron regulations on O sites. Therefore, O sites with more charge accumulated have  
11 a stronger tendency to spontaneously bind the H atoms in urea molecular, thus  
12 facilitating the chemical UOR process. The yellow area represents the accumulation  
13 of the bader charge, and the blue area represents the loss of the bader charge.  
14 Gray atom: Ni; dark atom: W; red atom: O; pink atom: H.

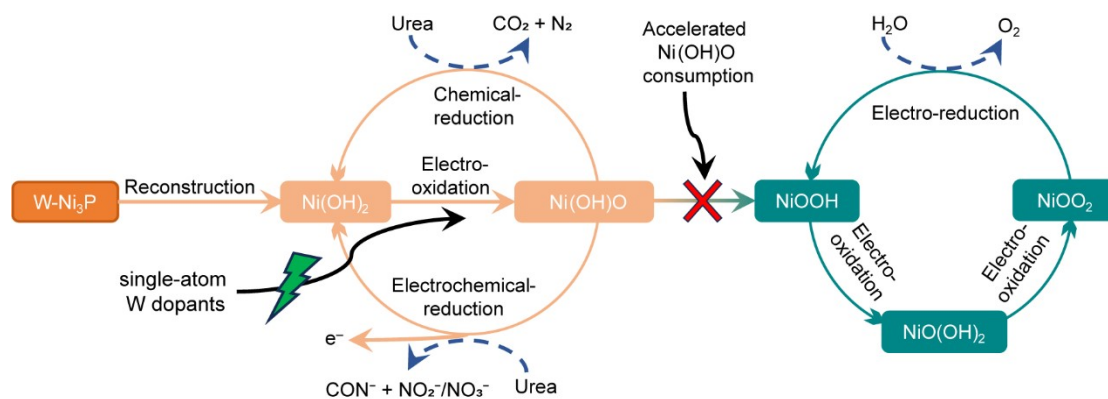

1

2 **Fig. S24 The competition mechanism on np/W-P-Ni(OH)<sub>2</sub> electrode.** The W doping  
 3 realizes the virtuous circle between Ni(OH)<sub>2</sub> and Ni(OH)O by simultaneously  
 4 accelerating the generation and consumption of Ni(OH)O active species, which can  
 5 effectively prevent the accumulation of Ni(OH)O to form OER-favored NiOOH  
 6 species.

7

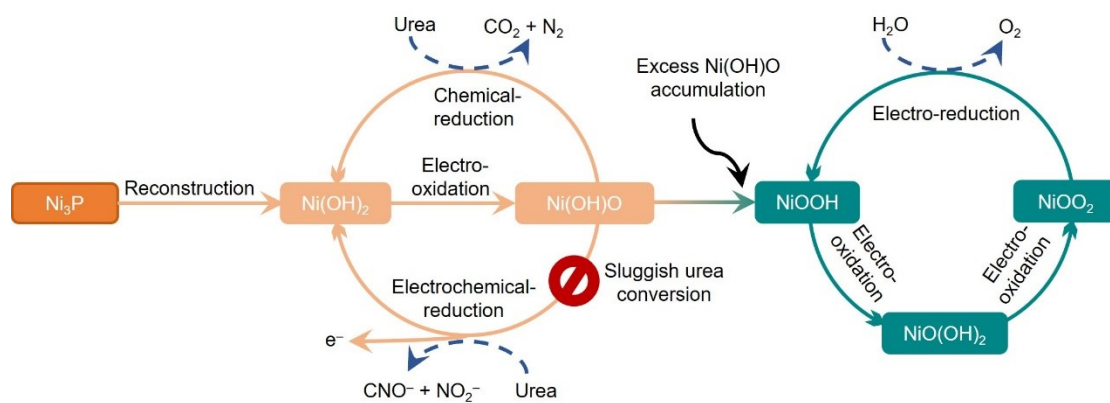

1

2 **Fig. S25 The competition mechanism on np/P-Ni(OH)<sub>2</sub> electrode.** The sluggish  
 3 UOR prevents the Ni(OH)O species from being consumed in time, leading to the  
 4 accumulation of excess Ni(OH)O to form NiOOH. This active NiOOH can gradually  
 5 switch the reaction from UOR to OER.

6

1 **Tab. S1** The element contents of np/W-P-Ni(OH)<sub>2</sub> obtained by XPS.

| Element | Atomic ratio (at.%) | Mass ratio (wt.%) |
|---------|---------------------|-------------------|
| Ni      | 21.99               | 48.26             |
| O       | 73.07               | 43.72             |
| P       | 4.55                | 5.27              |
| W       | 0.40                | 2.75              |

2

3

1 **Table S2.** The fitting parameters of np/W-P-Ni(OH)<sub>2</sub> and np/W-Ni<sub>3</sub>P.

| Samples                    | Paths | R (Å) | N    | $\Delta E_0$ (eV) | $\sigma^2$ (Å <sup>2</sup> ) | R-factor |
|----------------------------|-------|-------|------|-------------------|------------------------------|----------|
| np/W-P-Ni(OH) <sub>2</sub> | W-O   | 1.824 | 4.5  | 7.133             | 0.005                        | 0.031    |
|                            | W-P   | 2.471 | 3.69 |                   | 0.005                        |          |
| np/W-Ni <sub>3</sub> P     | W-P   | 2.416 | 2.93 | 3.009             | 0.004                        | 0.057    |

2  
3

**1 Tab. S3 The UOR performance of this work and other state-of-art nickel-based  
2 catalysts.**

| Catalysts                             | $\eta@100$ mA<br>cm <sup>-2</sup> (V) | Tafel slope<br>(mV dec <sup>-1</sup> ) | Electrolyte              | Ref |
|---------------------------------------|---------------------------------------|----------------------------------------|--------------------------|-----|
| This work                             | 1.35                                  | 32.4                                   | 1 M KOH &<br>0.33 M urea | /   |
| NCVS-3                                | 1.54                                  | 30.3                                   | 1 M KOH &<br>0.33 M urea | 1   |
| V-Ni(OH) <sub>2</sub>                 | 1.47                                  | 29.1                                   | 1 M KOH &<br>0.33 M urea | 2   |
| Mo-NiS                                | 1.36                                  | 19.3                                   | 1 M KOH &<br>0.5 M urea  | 3   |
| NiOOH/(LDH/ $\alpha$ -<br>FeOOH)      | 1.40                                  | 30.1                                   | 1 M KOH &<br>0.33 M urea | 4   |
| Ni-CuO NAs/CF                         | 1.36                                  | 37.1                                   | 1 M KOH &<br>0.33 M urea | 5   |
| Ni(OH) <sub>2</sub><br>nanoflakes     | 1.56                                  | 36.0                                   | 1 M KOH &<br>0.33 M urea | 6   |
| NF/NiMoO-Ar                           | 1.41                                  | 19.0                                   | 1 M KOH &<br>0.5 M urea  | 7   |
| IrO <sub>x</sub> /Ni(OH) <sub>2</sub> | 1.36                                  | 45.7                                   | 1 M KOH &<br>0.33 M urea | 8   |

|                                       |      |      |                          |    |
|---------------------------------------|------|------|--------------------------|----|
| NiCoMoCuO <sub>x</sub> H <sub>y</sub> | 1.38 | 45.8 | 1 M KOH &<br>0.33 M urea | 9  |
| V <sub>2</sub> O <sub>3</sub> /Ni/NF  | 1.41 | 32.0 | 1 M KOH &<br>0.5 M urea  | 10 |
| Ni/MNO-10                             | 1.43 | 51.2 | 1 M KOH &<br>0.5 M urea  | 11 |
| NiClO-D                               | 1.44 | 41.0 | 1 M KOH &<br>0.33 M urea | 12 |
| Ni-WO <sub>x</sub>                    | 1.42 | 39.0 | 1 M KOH &<br>0.33 M urea | 13 |

1

2

1 **Tab. S4 The calculated formation energy ( $E_f$ ) of the hydroxyl dehydrogenation**  
 2 **process on pure Ni(OH)<sub>2</sub> and W doped Ni(OH)<sub>2</sub>.**

| Structures          | $E_0$ before | $E_0$ after | $E_f$   |
|---------------------|--------------|-------------|---------|
| Ni(OH) <sub>2</sub> | -399.488     | -393.761    | 2.31885 |
| W-NiOOH(Ni1)        | -405.766     | -402.304    | 0.05288 |
| W-NiOOH(Ni2)        |              | -401.820    | 0.53691 |

3

4



1 **Tab. S5** The calculated bader charge analysis of pure Ni(OH)<sub>2</sub> and W doped

2 Ni(OH)<sub>2</sub>.

| Structures            | Charge         |       |        |        |
|-----------------------|----------------|-------|--------|--------|
|                       | E <sub>0</sub> | Ni    | O      | W      |
| Ni(OH) <sub>2</sub>   | -398.703       | 8.761 | 7.159  |        |
| NiOOH                 | -393.761       | 8.725 | 6.834  |        |
| W-Ni(OH) <sub>2</sub> | -405.496       | 8.785 | 6.831  | 12.304 |
| W-NiOOH(Ni1)          | -402.304       | 8.865 | 7.013  | 12.865 |
| W-NiOOH(Ni2)          | -401.820       | 8.823 | 7.023  | 12.074 |
|                       | Delta charge   |       |        |        |
|                       | Ni             | O     | W      |        |
| Ni(OH) <sub>2</sub>   | -1.239         | 1.159 |        |        |
| NiOOH                 | -1.275         | 0.834 |        |        |
| W-Ni(OH) <sub>2</sub> | -1.215         | 0.831 | -1.696 |        |
| W-NiOOH(Ni1)          | -1.135         | 1.013 | -1.135 |        |
| W-NiOOH(Ni2)          | -1.177         | 1.023 | -1.926 |        |

3

4

5

## 1 References

- 2 1. Z. Ji, Y. Song, S. Zhao, Y. Li, J. Liu and W. Hu, *ACS Catal.*, 2022, **12**, 569-579.
- 3 2. H. Qin, Y. Ye, J. Li, W. Jia, S. Zheng, X. Cao, G. Lin and L. Jiao, *Adv. Funct.*  
4 *Mater.*, 2023, **33**, 2209698.
- 5 3. Y. Zhou, Y. Wang, D. Kong, Q. Zhao, L. Zhao, J. Zhang, X. Chen, Y. Li, Y. Xu  
6 and C. Meng, *Adv. Funct. Mater.*, 2023, **33**, 2210656.
- 7 4. M. Cai, Q. Zhu, X. Wang, Z. Shao, L. Yao, H. Zeng, X. Wu, J. Chen, K. Huang  
8 and S. Feng, *Adv. Mater.*, 2023, **35**, 2209338.
- 9 5. H. Sun, J. Liu, H. Kim, S. Song, L. Fei, Z. Hu, H. J. Lin, C. T. Chen, F. Ciucci  
10 and W. Jung, *Adv. Sci.*, 2022, **9**, 2204800.
- 11 6. W. Yang, X. Yang, C. Hou, B. Li, H. Gao, J. Lin and X. Luo, *Appl. Catal. B:*  
12 *Environ.*, 2019, **259**, 118020.
- 13 7. Z.-Y. Yu, C.-C. Lang, M.-R. Gao, Y. Chen, Q.-Q. Fu, Y. Duan and S.-H. Yu,  
14 *Energy & Environ. Sci.*, 2018, **11**, 1890-1897.
- 15 8. Q. Zheng, Y. Yan, J. Zhong, S. Yan and Z. Zou, *Energy Environ. Sci.*, 2024, **17**,  
16 748-759.
- 17 9. R. Li, Y. Li, P. Yang, P. Ren, D. Wang, X. Lu, H. Zhang, Z. Zhang, P. Yan, J.  
18 Zhang, M. An, B. Wang, H. Liu and S. Dou, *Small*, 2023, **19**, 2302151.
- 19 10. Q. Zhang, B. Liu, L. Li, Y. Ji, C. Wang, L. Zhang and Z. Su, *Small*, 2021, **17**,  
20 2005769.
- 21 11. V. Maheskumar, A. Min, C. J. Moon, R. A. Senthil and M. Y. Choi, *Small*  
22 *Struct.*, 2023, **4**, 2300212.
- 23 12. L. Zhang, L. Wang, H. Lin, Y. Liu, J. Ye, Y. Wen, A. Chen, L. Wang, F. Ni, Z.

- 1           Zhou, S. Sun, Y. Li, B. Zhang and H. Peng, *Angew. Chem. Int. Ed.*, 2019, **58**,  
2           16820-16825.
- 3 13.       L. Wang, Y. Zhu, Y. Wen, S. Li, C. Cui, F. Ni, Y. Liu, H. Lin, Y. Li, H. Peng and  
4           B. Zhang, *Angew. Chem. Int. Ed.*, 2021, **60**, 10577-10582.
- 5
